# Supplementary material for: Differential Inhibitory Actions of Multitargeted Tyrosine Kinase Inhibitors on Different Ionic Current Types in Cardiomyocytes
Source: MDPI journal article supplement (doi:10.3390/ijms21051672), 2020-02-29
Supplement: s1 [file s1]

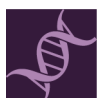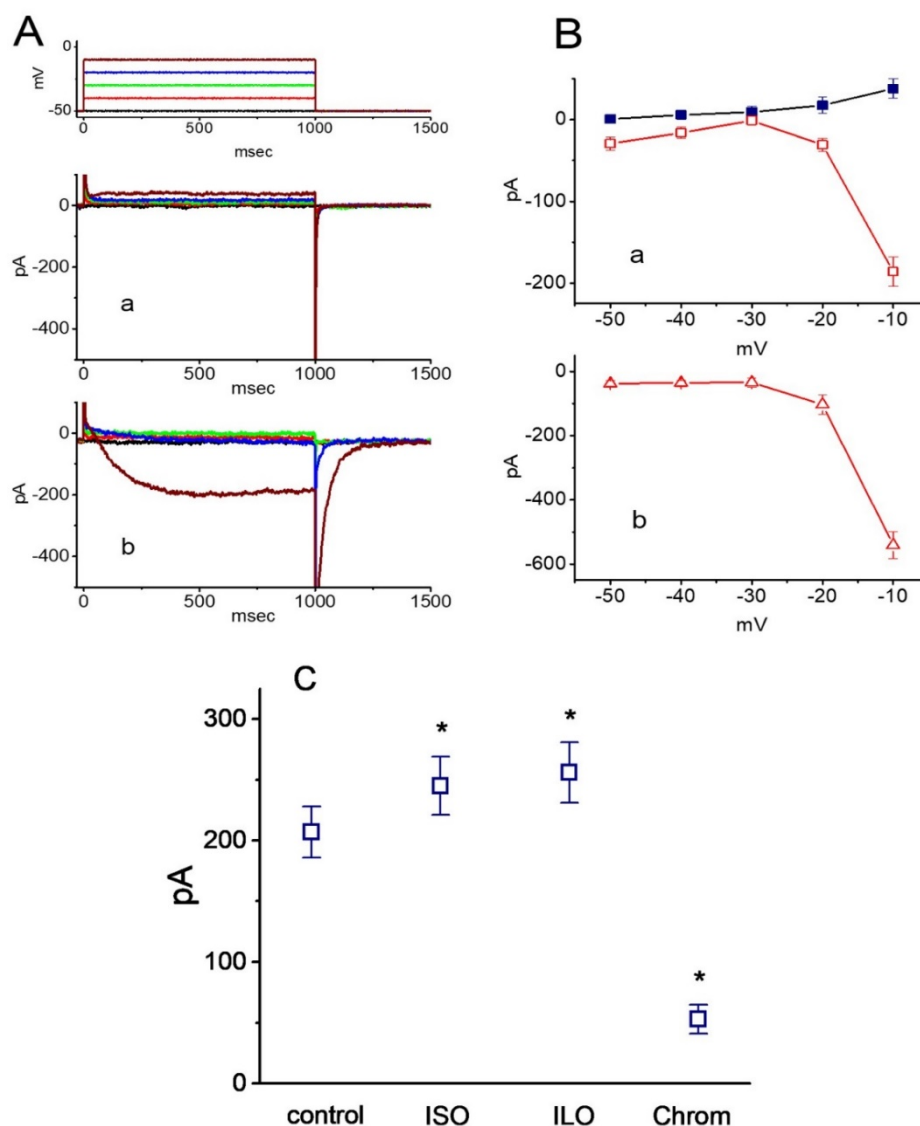

**Figure S1.** Effect of high K<sup>+</sup> solution on K<sup>+</sup> current in H9c2 cells. The superimposed current traces shown in (Aa) are control, and those in (Ab) were obtained 2 min after cells were exposed to high-K<sup>+</sup> (145 mM), Ca<sup>2+</sup>-free solution. (Ba) Averaged current-voltage (*I*-*V*) relationships of K<sup>+</sup> current measured at the end of voltage pulses in the presence of 5.4 mM KCl (filled squares) or 145 mM KCl (open squares) (*n*=8-12). (Bb) Averaged *I*-*V* relationship for the activation of *I*<sub>tail</sub> measured from cells bathed in high-K<sup>+</sup>, Ca<sup>2+</sup>-free solution (*n*=8-11 for each point). (C) Plot graph showing effect of isoproterenol, iloprost, chromanol 293B on *I*<sub>K(s)</sub> amplitude. (*n* = 7-9 for each point). ISO: 1 μM isoproterenol; ILO: 10 μM iloprost; Chrom: 1 μM chromanol 293B. \*Significantly different from control (i.e., high-K<sup>+</sup>, Ca<sup>2+</sup>-free solution without addition of any agent), *p* < 0.05 by contrasts from one-way analysis of variance (ANOVA).

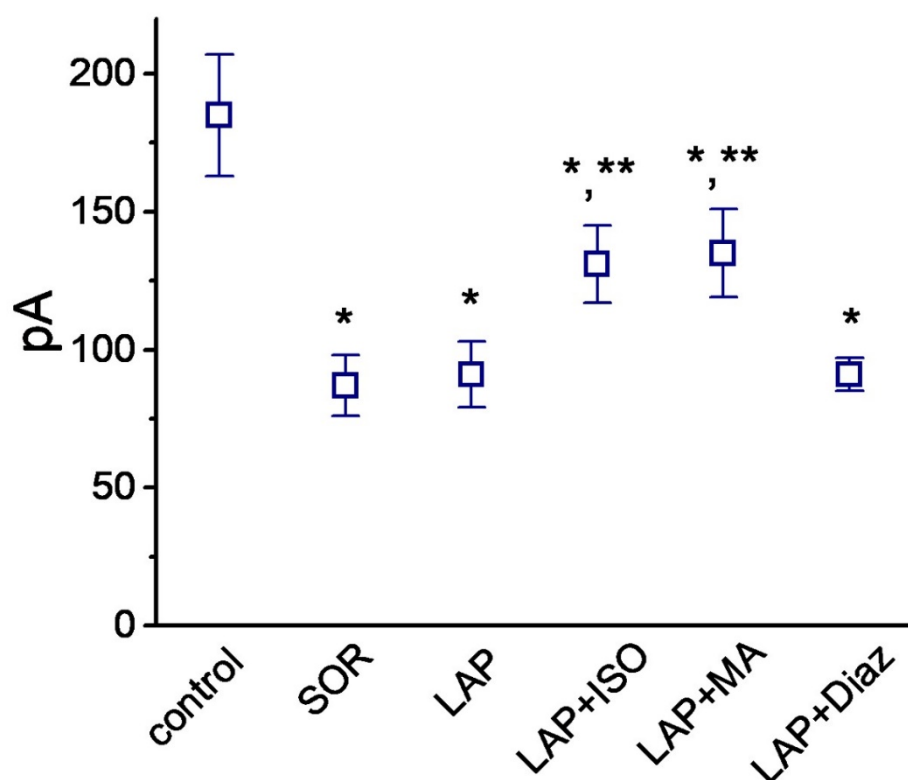

**Figure S2.** Summary of plot graph showing the effects of SOR, LAP, LAP plus isoproterenol, LAP plus meclofenamic acid and LAP plus diazoxide on  $I_{K(S)}$  amplitude. Each bar represents the mean $\pm$ SEM ( $n = 8-11$ ). SOR: 3  $\mu$ M SOR; LAP: 3  $\mu$ M LAP; ISO: 1  $\mu$ M isoproterenol; MA: 10  $\mu$ M meclofenamic acid; Diaz: 30  $\mu$ M diazoxide. (an ATP-sensitive potassium *channel* activator) \*Significantly different from control ( $P < 0.05$ ) and \*\*significantly different from 3  $\mu$ M LAP alone group ( $p < 0.05$ ). \* $p < 0.05$  by contrasts from one-way analysis of variance (ANOVA).

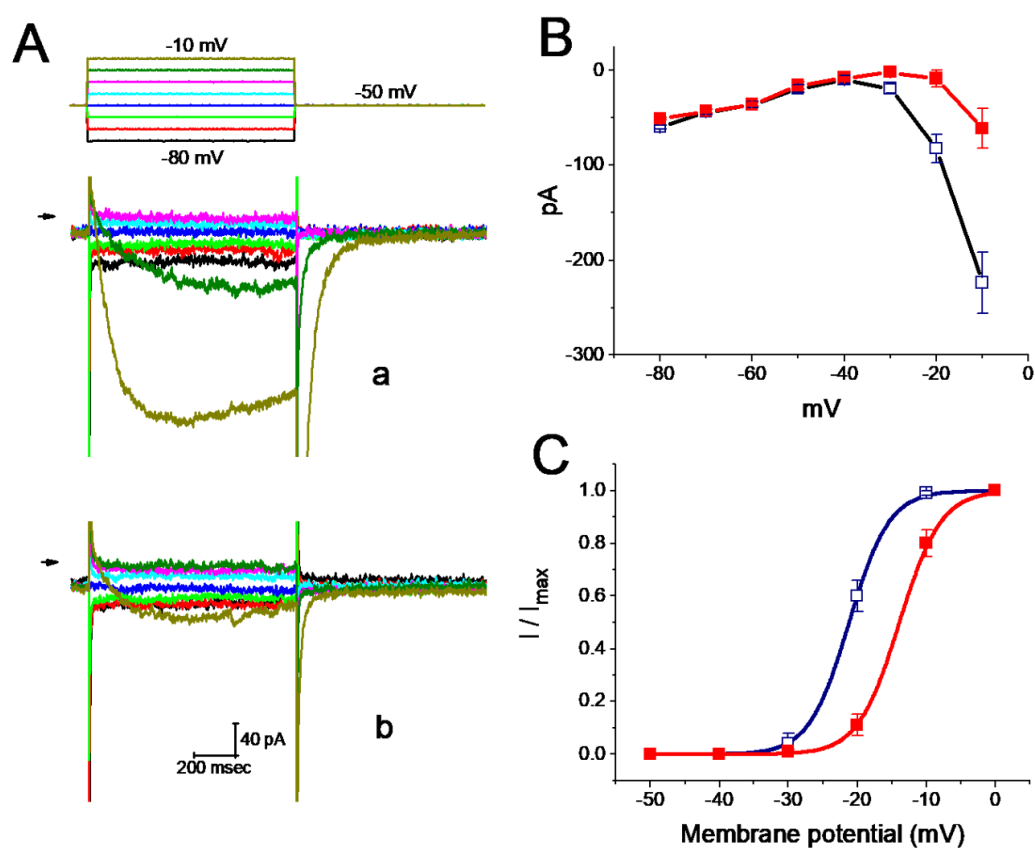

**Figure S3.** Effect of LAP on  $I-V$  relation of  $I_{K(S)}$  recorded from H9c2 cells. (A) Superimposed current traces obtained in the absence (a) and presence (b) of 3  $\mu\text{M}$  LAP. (B) Effect of LAP on averaged  $I-V$  relation of  $I_{K(S)}$  in H9c2 cells ( $n = 10$  for each point).  $\square$ : control;  $\blacksquare$ : 3  $\mu\text{M}$  LAP. (C) Voltage dependence of  $I_{K(S)}$  in the absence ( $\square$ ) and presence ( $\blacksquare$ ) of 3  $\mu\text{M}$  LAP ( $n = 9$  for each point).

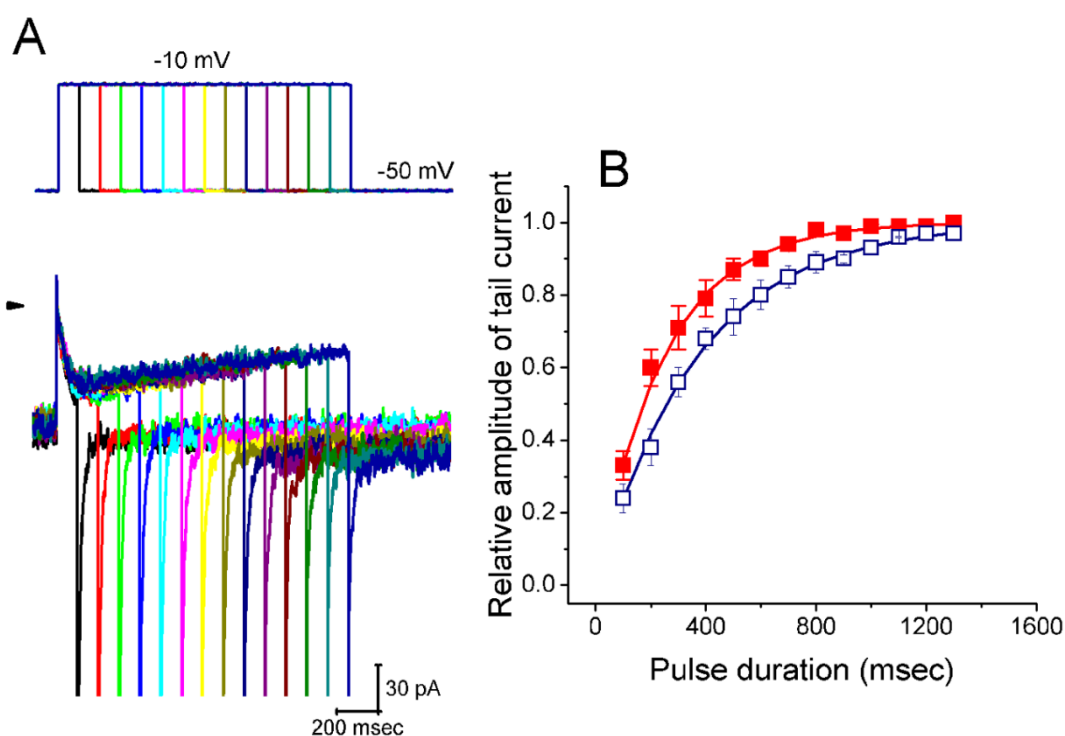

**Figure S4.** Effect of LAP on the recovery of  $I_{K(S)}$  deactivation recorded from H9c2 cells. (A) Superimposed voltage and current traces obtained in the presence of 3 μM LAP are shown in the upper and lower part of panel, respectively. Arrowhead indicates the zero current level. (B) Relationships of pulse intervals versus amplitude of deactivating tail current in the absence (□) and presence (■) of 3 μM LAP ( $n=7-8$  for each point).

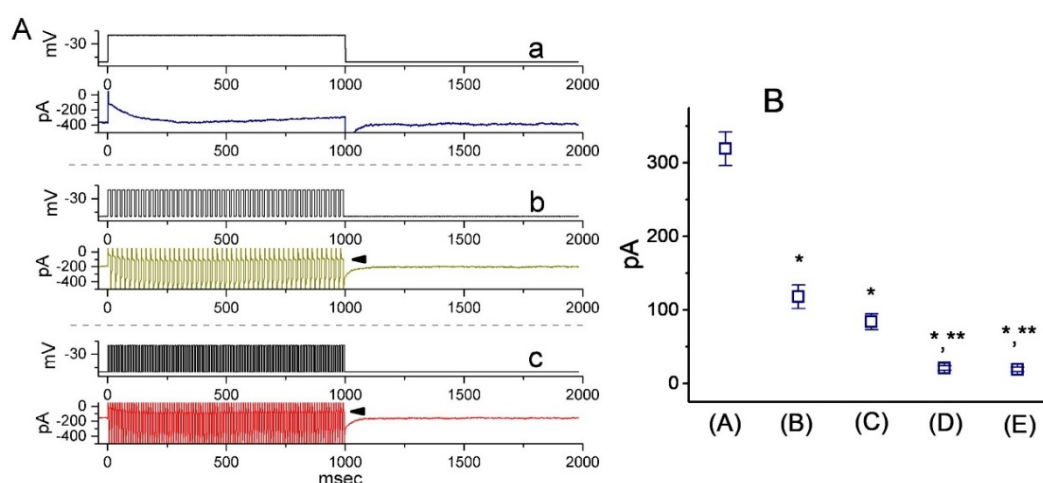

**Figure S5.** Effect of LAP on  $I_{K(S)}$  evoked by repetitive stimuli in H9c2 cells. (A) Original current traces elicited in response to a single depolarizing pulse (a), during repetitive depolarizations with a duration of 12 msec at a rate of 50 Hz (b) and that with a duration of 6 msec at a rate of 100 Hz (c). (B) Summary of the data showing effect of LAP on  $I_{K(S)}$  elicited by a single pulse and repetitive stimuli with 50 or 100 Hz ( $n = 7-9$  for each point). A: single pulse; B: repetitive stimuli with 50 Hz; C: repetitive stimuli with 100 Hz; D: 50-Hz repetitive stimuli with 3 μM LAP; E: 100-Hz repetitive stimuli with 3 μM LAP. \*Significantly different from control (i.e., during single pulse;  $p < 0.05$ ) and \*\*significantly

different from the group with repetitive stimuli at 100 Hz alone,  $p < 0.05$  by contrasts from one-way analysis of variance (ANOVA).
